# Supplementary material for: Synergy of electrolyte manipulation and separator functionalization enables ultralong-life nonaqueous magnesium-organic batteries
Source: Royal Society of Chemistry journal article supplement (doi:10.1039/d4ta04464a), 2024-01-01
Supplement: d4ta04464a1.pdf [file d4ta04464a1.pdf]

Supporting Information for:

Synergy of Electrolyte Manipulation and Separator  
Functionalization Enables Ultralong-life Nonaqueous Magnesium-  
Organic Batteries

Xiaolan Xue,\* Tianlong Huang, Yang Zhang, Qianjie Zhong, Mengke Tang, Han Shang,  
Yuanxiang Zhang, Maosheng Cui, Jiqiu Qi, Huan Xu,\* Yanwei Sui\*

School of Materials Science and Physics, China University of Mining and Technology,  
Xuzhou 221116, China

\*Address correspondence to [xuexiaolan@cumt.edu.cn](mailto:xuexiaolan@cumt.edu.cn); [hihuan@cumt.edu.cn](mailto:hihuan@cumt.edu.cn);  
[suiyanwei@cumt.edu.cn](mailto:suiyanwei@cumt.edu.cn)

## **Experimental section**

*Preparation of Graphene@PVP dispersion:* 3 g of commercial graphite and 0.5 g of polyvinyl pyrrolidone (PVP, K30) were first added into 500 ml of deionized water. Then, the obtained mixtures were transferred into a nanobead mill and grounded for 72 hours to obtain a uniformly dispersed Graphene@PVP dispersion.

*Fabrication of Graphene@PVP/GF separator:* A certain volume of the as-obtained Graphene@PVP dispersion above was vacuum filtered through the commercial glass fiber separator (Whatman Grade GF/D) with a diameter of 100 mm, followed by drying at 50 °C for 24 h. The resulting Graphene@PVP-coated GF (Graphene@PVP/GF) separator was pouched into discs with a diameter of 19 mm. The weight loading of the Graphene@PVP interlayer was about 0.2 mg cm<sup>-2</sup>.

*Preparation of electrolyte:* The preparation of Mg(HMDS)<sub>2</sub>-MgCl<sub>2</sub>/THF and Mg(HMDS)<sub>2</sub>-MgCl<sub>2</sub>/THF-PP14TFSI electrolytes were carried out in an Ar-filled glovebox with both H<sub>2</sub>O and O<sub>2</sub> content below 0.01 ppm, according to the previous reports<sup>12,S1</sup>.

*Characterization:* Scanning electron microscope (SEM, Zeiss Gemini 500, Germany) was utilized to determine the morphological features of the different samples. The reflectance Fourier transform infrared (FTIR) spectra were collected on a Spectrum 3 spectrometer. The crystal structure was investigated on Bruker D8 Focus powder X-ray diffractometer

(XRD) with Cu K $\alpha$  as radiation source. X-ray photoelectron spectroscopy (XPS) measurements were performed by a Thermo Fisher Scientific ESCALAB 250Xi instrument using Al K $\alpha$  as radiation source.

*Electrochemical Measurements:* The phenazine (PZ) cathode was prepared as follows: the directly purchased PZ powder, acetylene black, and poly(vinylidene fluoride) (PVDF) were mixed at a mass ratio of 6:3:1 and then ground in a mortar for half an hour. An appropriate amount of 1-methyl-2-pyrrolidinone (NMP, >99%) was then added into the above powder mixture and stirred continuously for 6 h. The resulting homogeneous slurry was scraped onto the carbon paper and dried in a vacuum oven at 50 °C for 24 h. Coin 2032 cells were assembled with PZ cathode, modified Graphene@PVP/GF separator or pristine GF separator, Mg(HMDS)<sub>2</sub>-MgCl<sub>2</sub>-based electrolyte, and Mg foil anode in an Ar-filled glovebox. The loading mass of active materials in the PZ cathode is about 0.5 mg cm<sup>-2</sup> and the volume of electrolyte used in each cell is 100  $\mu$ L. The galvanostatic charging/discharging measurements were conducted on a LAND CT3001A battery testing system with a voltage window of 0.2–2.2 V (vs. Mg<sup>2+</sup>/Mg). The galvanostatic intermittent titration technique (GITT) test was performed on the same battery testing system and the GITT curves were assessed under a constant current pulse of 100 mA g<sup>-1</sup>, featuring pulse and relaxation intervals of 10 and 20 minutes, respectively. The cyclic voltammetry (CV) curves were collected on a Gamry Interface1010E electrochemical workstation. The electrochemical impedance spectroscopy (EIS) tests were conducted in a frequency range of 0.01–100000 Hz with applied amplitude of 0.005 V on the same electrochemical

workstation.

### **Computational details and methodology**

The molecular geometries of PP14 cation, HDMS and TFSI anions, and THF solvent molecule in two electrolyte systems of  $\text{Mg}(\text{HMDS})_2\text{-MgCl}_2/\text{THF}$  and  $\text{Mg}(\text{HMDS})_2\text{-MgCl}_2/\text{THF-0.5PP14TFSI}$  were first optimized by the Gaussian 16 package at B3LYP/6-311+G(d) level of theory<sup>S2</sup>. The second-order Møller-Plesset perturbation<sup>S3</sup> method and the correlation-consistent polarized valence cc-pVTZ(-f) basis set<sup>S4</sup> were used to fit the molecular electrostatic potential at atomic centers to calculate the atomic partial charges on the above solvent molecules. Based on the previous work<sup>S5</sup>, the atomistic AMBER force field were employed for all ions and molecules. The cross-interaction parameters between different atomic types were obtained based on the Lorentz-Berthelot combination rule.

Molecular dynamic (MD) simulations were performed using GROMACS software package with cubic periodic boundary conditions<sup>S6</sup>. Classic leapfrog integration Verlet algorithm<sup>S7</sup> with a time step of 1.0 fs was used to integrate the motion equations of all atoms. A cutoff radius of 1.6 nm was applied for short-range van der Waals interactions and real-space electrostatic interactions. Long-range electrostatic interactions in reciprocal space were handled by using the particle-mesh Ewald (PME) summation method<sup>S8</sup> with an interpolation order of 5 and a Fourier grid spacing of 0.15 nm. Steepest descent algorithm was first used to minimize the energy of all simulation systems, followed by the gradual temperature reduction from 700 K to room temperature (300 K) within 10 ns. Subsequently, the annealed simulation systems were equilibrated in an isothermal-isobaric

(NPT) ensemble for 10 ns, where Nosé-Hoover thermostat and a Parrinello-Rahman barostat with coupling constants of 0.4 and 0.2 ps were employed to control the temperature at 300 K and the pressure at 1 atm. Atomistic simulations were further performed in a canonical ensemble (NVT) for 30 ns, with simulation trajectories recorded at intervals of 100 fs for structural and dynamical analysis.

**Table S1.** Two electrolyte model systems with and without PP14TFSI simulated in this work.

|                              | Mg(HMDS) <sub>2</sub> -MgCl <sub>2</sub> /THF | Mg(HMDS) <sub>2</sub> -MgCl <sub>2</sub> /THF-0.5PP14TFSI |
|------------------------------|-----------------------------------------------|-----------------------------------------------------------|
| No. of MgCl <sub>2</sub>     | 90                                            | 65                                                        |
| No. of Mg(HDMS) <sub>2</sub> | 22                                            | 16                                                        |
| No. of THF                   | 1116                                          | 806                                                       |
| No. of PP14TFSI              | –                                             | 103                                                       |
| Total No. of atoms           | 15988                                         | 16497                                                     |
| System size                  | (5.6881 nm) <sup>3</sup>                      | (5.7466 nm) <sup>3</sup>                                  |

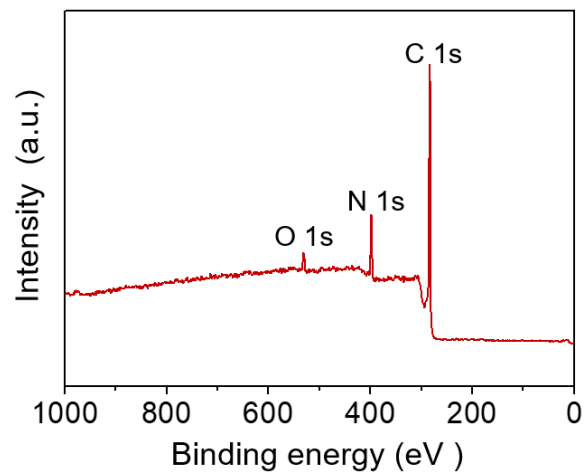

**Fig. S1** XPS survey spectrum of phenazine.

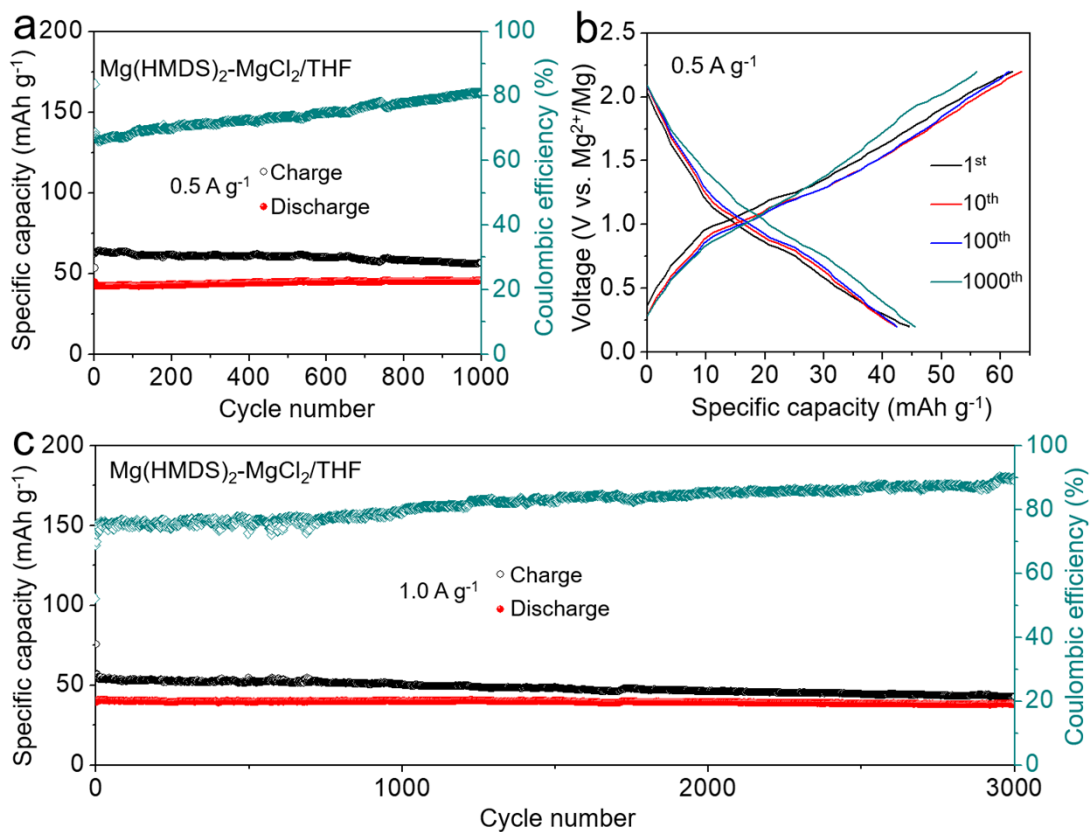

**Fig. S2** Electrochemical performance of Mg/PZ cells with pristine GF separator and Mg(HMDS)<sub>2</sub>-MgCl<sub>2</sub>/THF electrolyte. (a, b) Cycling performance and the corresponding discharge-charge profiles at 0.5 A g<sup>-1</sup>. (c) Long-term cycling stability at 1.0 A g<sup>-1</sup>.

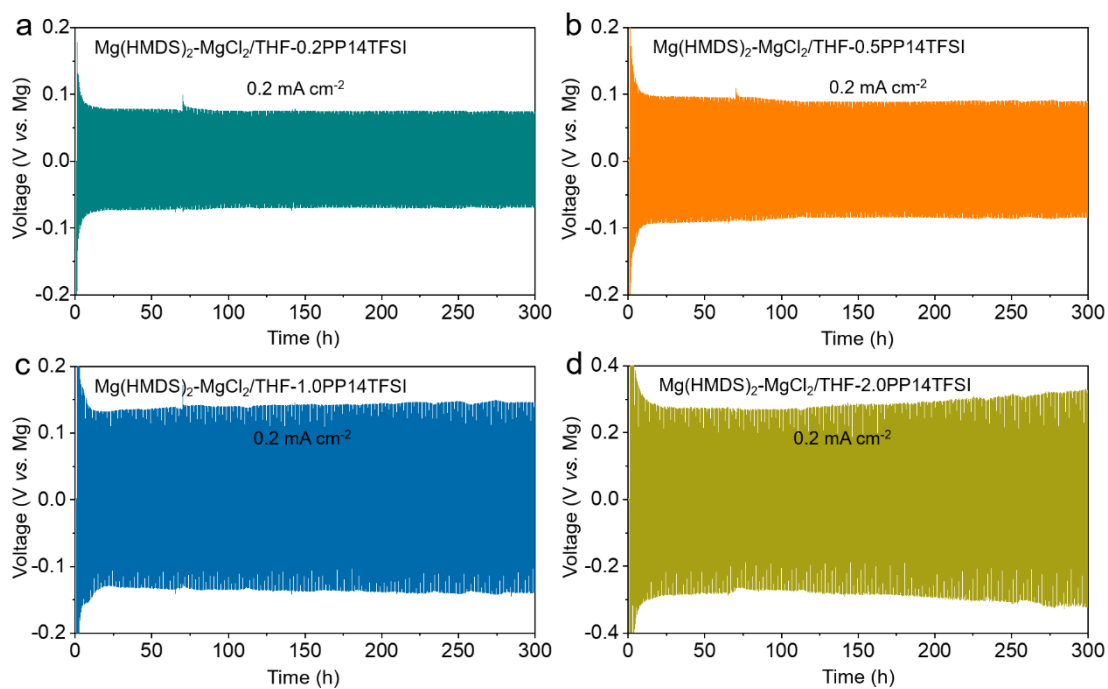

**Fig. S3** Cycling performance of Mg||Mg cells at  $0.2 \text{ mA cm}^{-2}$  using different electrolytes of (a)  $\text{Mg}(\text{HMDS})_2\text{-MgCl}_2/\text{THF-0.2PP14TFSI}$ , (b)  $\text{Mg}(\text{HMDS})_2\text{-MgCl}_2/\text{THF-0.5PP14TFSI}$ , (c)  $\text{Mg}(\text{HMDS})_2\text{-MgCl}_2/\text{THF-1.0PP14TFSI}$ , (d)  $\text{Mg}(\text{HMDS})_2\text{-MgCl}_2/\text{THF-2.0PP14TFSI}$ , respectively.



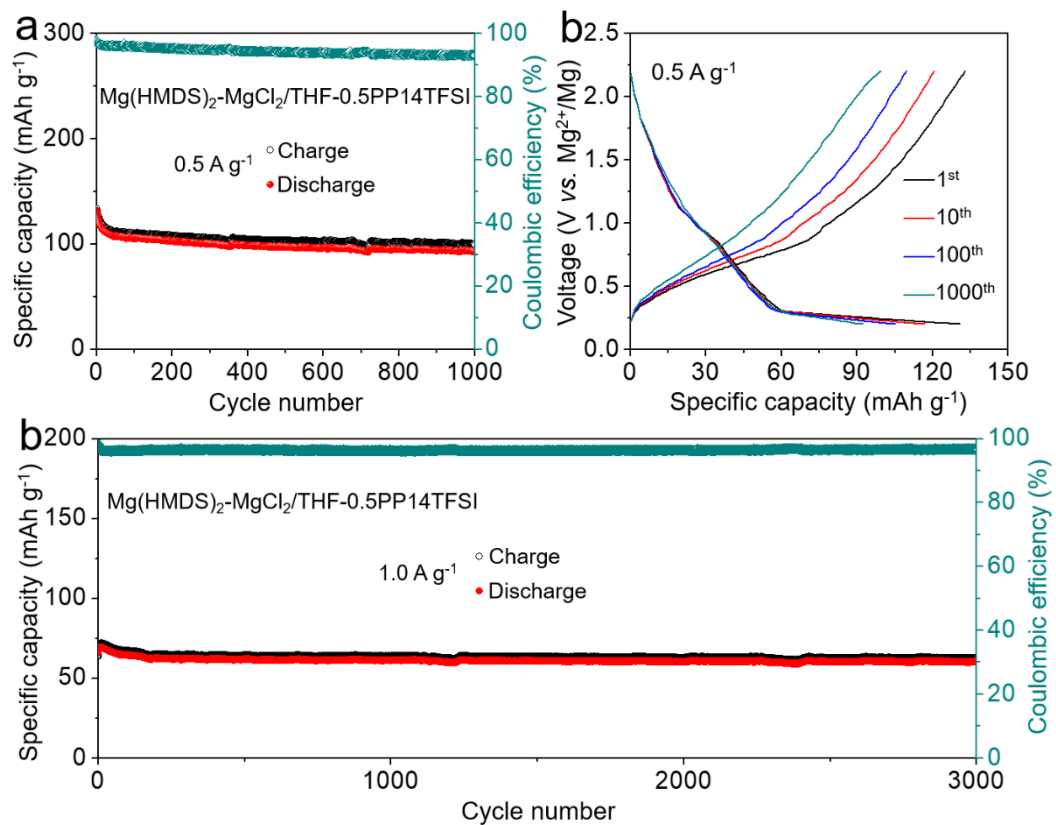

**Fig. S4** Electrochemical performance of Mg/PZ cells with pristine GF separator and Mg(HMDS)<sub>2</sub>-MgCl<sub>2</sub>/THF-0.5PP14TFSI electrolyte. (a, b) Cycling performance and the corresponding discharge-charge profiles at 0.5 A g<sup>-1</sup>. (c) Long-term cycling stability at 1.0 A g<sup>-1</sup>.

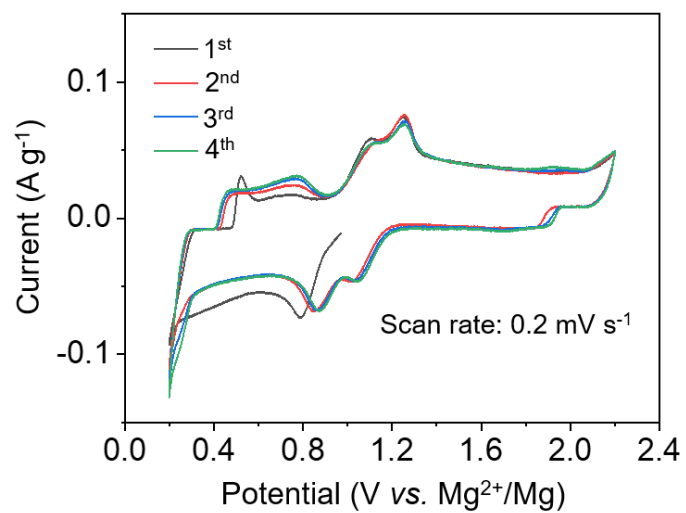

**Fig. S5** CV curves of Mg/PZ cells with Graphene@PVP/GF separator and Mg(HMDS)<sub>2</sub>-MgCl<sub>2</sub>/THF-0.5PP14TSFI electrolyte at a scan rate of 0.2 mV s<sup>-1</sup> between 0.2 and 2.2 V vs. Mg<sup>2+</sup>/Mg.

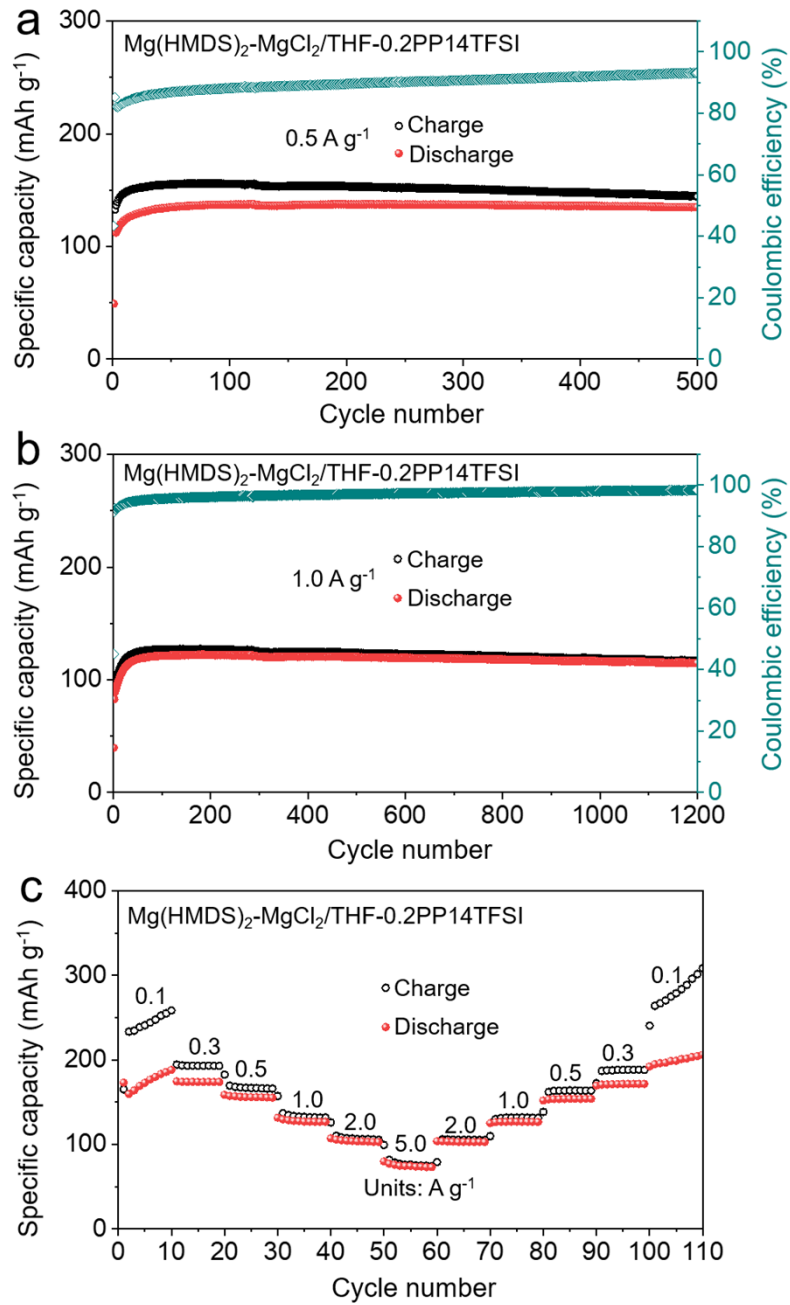

**Fig. S6 Electrochemical performance of Mg/PZ cells using Graphene@PVP/GF separator and  $\text{Mg}(\text{HMDS})_2\text{-MgCl}_2/\text{THF-0.2PP14TFSI}$  electrolyte. (a, b) Cycling performance at the current densities of  $0.5 \text{ A g}^{-1}$  and  $1.0 \text{ A g}^{-1}$ . (c) Rate capability at different current densities.**

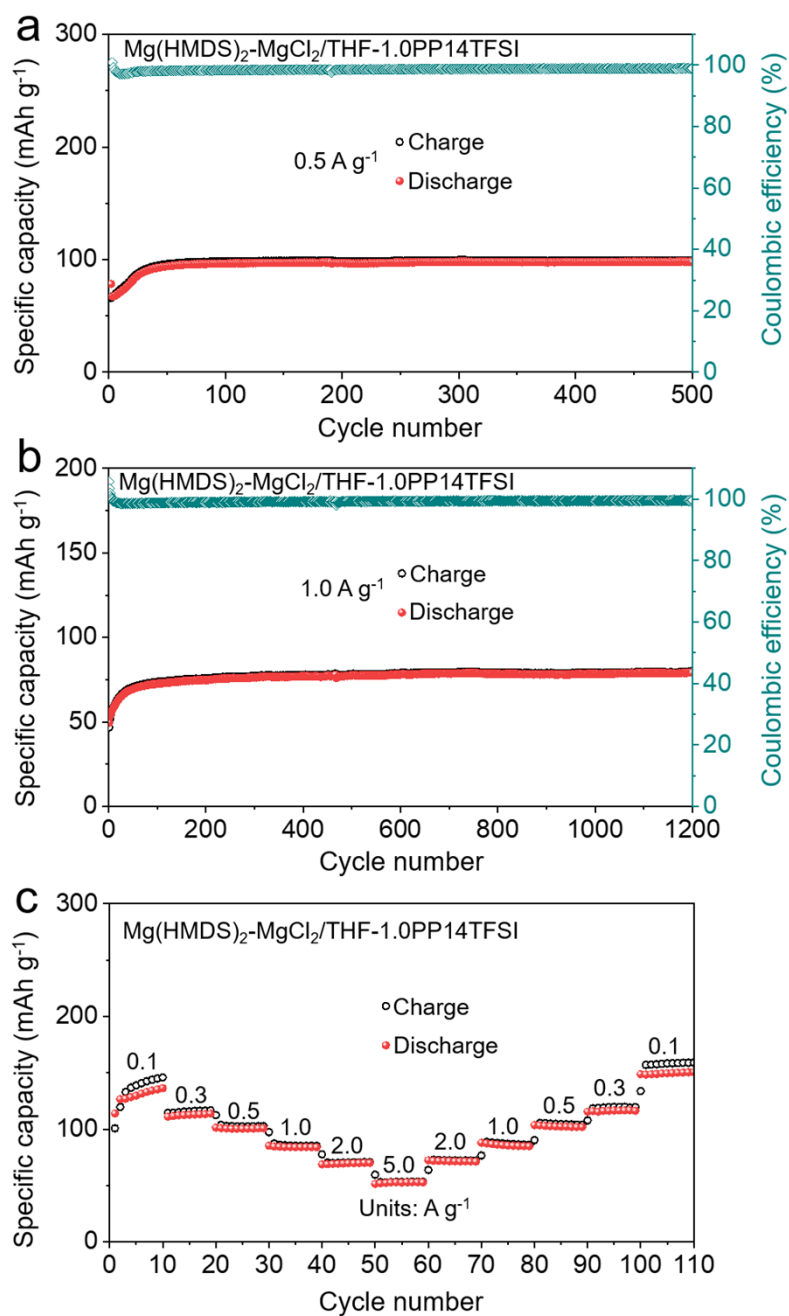

**Fig. S7 Electrochemical performance of Mg/PZ cells using Graphene@PVP/GF separator and  $\text{Mg}(\text{HMDS})_2\text{-MgCl}_2/\text{THF-1.0PP14TFSI}$  electrolyte. (a, b) Cycling performance at the current densities of  $0.5 \text{ A g}^{-1}$  and  $1.0 \text{ A g}^{-1}$ . (c) Rate capability at different current densities.**

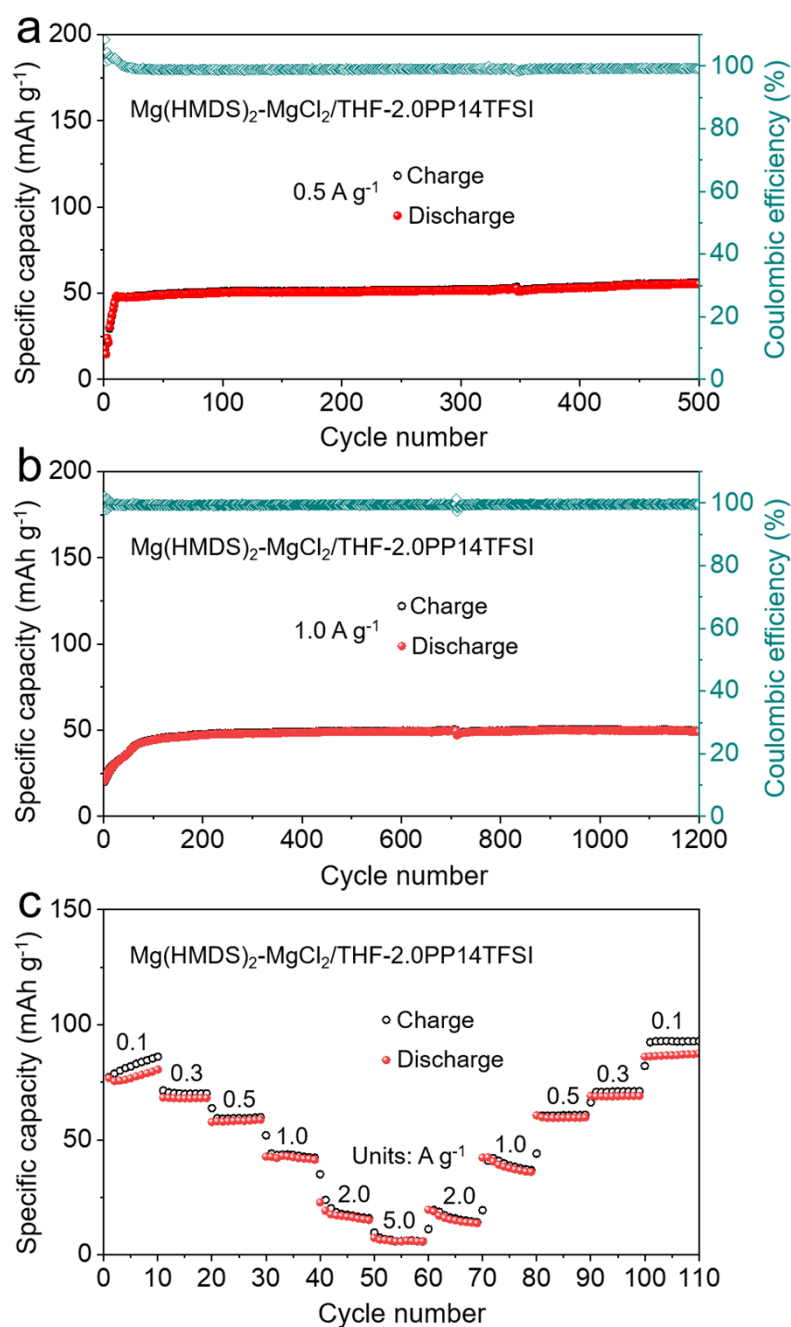

**Fig. S8 Electrochemical performance of Mg/PZ cells using Graphene@PVP/GF separator and Mg(HMDS)<sub>2</sub>-MgCl<sub>2</sub>/THF-2.0PP14TFSI electrolyte. (a, b) Cycling performance at the current densities of 0.5 A g<sup>-1</sup> and 1.0 A g<sup>-1</sup>. (c) Rate capability at different current densities.**

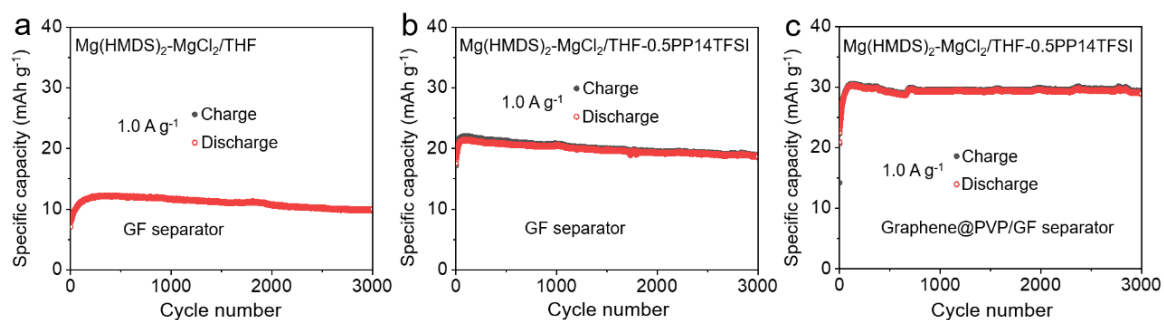

**Fig. S9** Electrochemical performance of cathode without PZ at 1.0 A g<sup>-1</sup> in three different cells: (a) one with a GF separator in Mg(HMDS)<sub>2</sub>-MgCl<sub>2</sub>/THF electrolyte, (b) another with a GF separator in Mg(HMDS)<sub>2</sub>-MgCl<sub>2</sub>/THF-0.5PP14TFSI electrolyte, and (c) the third with a Graphene@PVP/GF separator in Mg(HMDS)<sub>2</sub>-MgCl<sub>2</sub>/THF-0.5PP14TFSI electrolyte.

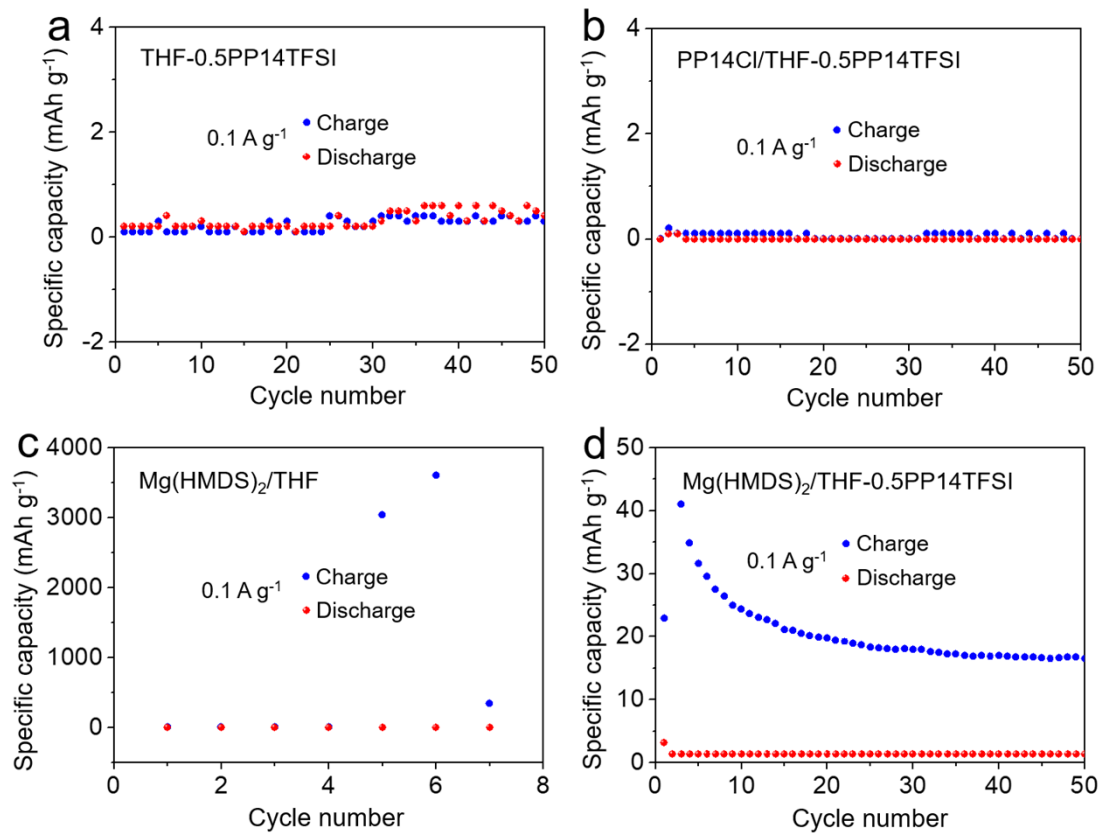

**Fig. S10** Electrochemical performance of PZ electrode tested at 0.1 A g<sup>-1</sup> in different electrolytes of THF-PP14TFSI, PP14Cl/THF-PP14TFSI, Mg(HMDS)<sub>2</sub>/THF, and Mg(HMDS)<sub>2</sub>/THF-PP14TFSI.

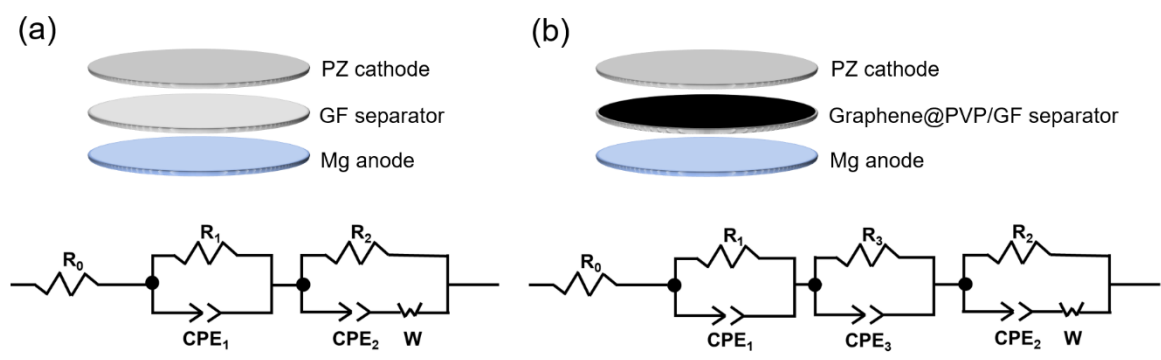

**Fig. S11** Equivalent circuits of the Mg//PZ cells using (a) conventional, and (b) Graphene@PVP-modified GF separators, recorded at open circuit voltage, respectively.



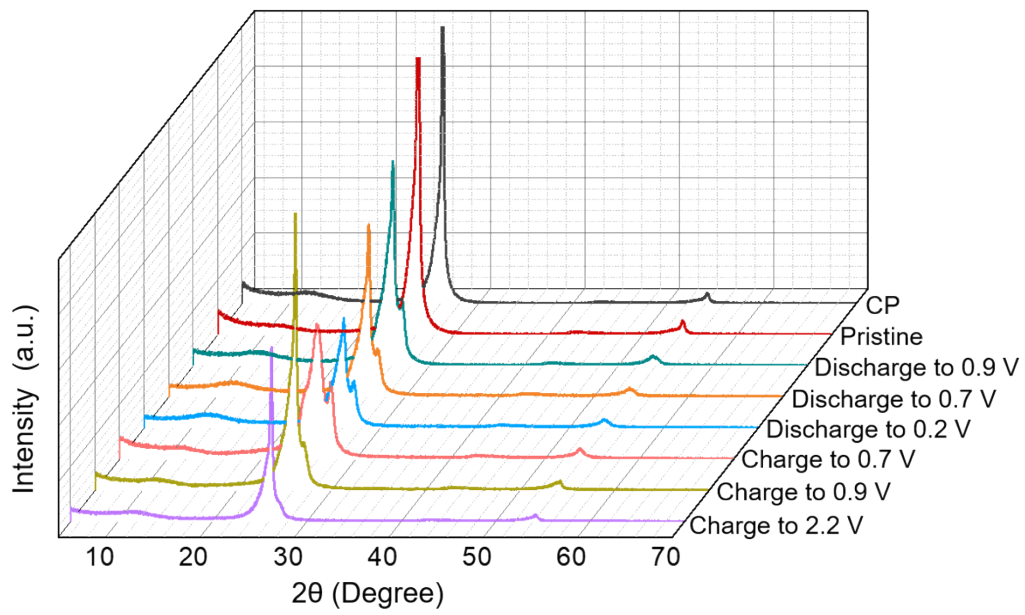

**Fig. S12** Ex XRD patterns of PZ cathode under different discharging/charging states at a current density of  $0.2 \text{ A g}^{-1}$ .

## References:

1. X. Xue, R. Chen, C. Yan, P. Zhao, Y. Hu, W. Kong, H. Lin, L. Wang and Z. Jin, *Adv. Energy Mater.*, 2019, **9**, 1900145.
2. J. R. Frisch, G. W. Trucks, H. B. Schlegel, G. E. Scuseria, M. A. Robb, J. R. Cheeseman, G. Scalmani, V. Barone, G. A. Petersson, H. Nakatsuji, X. Li, M. Caricato, A. V. Marenich, J. Bloino, B. G. Janesko, R. Gomperts, B. Mennucci and D. J. Hratch Gaussian 16, Revision C.01 Gaussian, Inc., Wallingford CT 2016.
3. R. J. Iuliucci, J. D. Hartman and G. J. Beran, *J. Phys. Chem. A*, 2023, **127**, 2846-2858.
4. M.M. Kermani and D. G. Truhlar, *Chem. Phys. Lett.*, 2023, **825**, 140575.
5. F. U. Shah, S. Glavatskih, O. N. Antzutkin, A. Laaksonen, *J. Phys. Chem. B*, 2014, **118**, 8711-8723.
6. M. J. Abraham, T. Murtola, R. Schulz, S. Páll, J. C. Smith, B. Hess and E. Lindahl, *SoftwareX*, 2015, **1**, 19-25.
7. M. A. Cuendet and W. F. Gunsteren, *J Chem. Phys.*, 2007, **127**, 184102.
8. Y. Wang, Y. Zhu, Z. Lu, A. Laaksonen, *Soft Matter*, 2018, **14**, 4252-4267.
